# Supplementary material for: Compositional variation of the human fecal microbiome in relation to azo-reducing activity: a pilot study
Source: Springer Nature journal article supplement (doi:10.1186/s13099-021-00454-0), 2021-10-08
Supplement: MOESM1 [file 19741326]

---

# Compositional variation of the human fecal microbiome in relation to azo-reducing activity: a pilot study

---

Sara A. Zahran<sup>1</sup>, Marwa Ali-Tammam<sup>1</sup>, Amal E. Ali<sup>1</sup>, Ramy K. Aziz<sup>2,3,4\*</sup>

<sup>1</sup>Department of Microbiology and Immunology, Faculty of Pharmacy, Future University in Egypt, 11835 New Cairo, Egypt

<sup>2</sup>Department of Microbiology and Immunology, Faculty of Pharmacy, Cairo University, 11562 Cairo, Egypt

<sup>3</sup>The Center for Genome and Microbiome Research, Faculty of Pharmacy, Cairo University, 11562 Cairo, Egypt

<sup>4</sup>Microbiology and Immunology Research Program, Children's Cancer Hospital Egypt 57357, 11617 Cairo, Egypt

\* Correspondence: **E-mail:** ramy.aziz@gmail.com

---

## SUPPLEMENTARY MATERIAL

---

### **Content:**

#### **Additional file 1 (this file):**

**Figure S1:** Total azoreduction by stool samples.

**Figure S2:** Log-scaled boxplots of the *Prevotella*-to-*Bacteroides* ratio among the three grades of azo-reduction.

**Figure S3:** Heatmap visualization of hierarchical clustering of the gut microbiota composition at the phylum level.

**Figure S4:** Boxplots comparing alpha diversity metrics in males and females.

**Figure S5:** Boxplots comparing alpha diversity metrics among different BMI groups.

**Supplementary Tables:** Multivariate analysis with partial-least squares (PLS) regression of different covariates vs. key phyla relative abundance (S1), gut microbiome biomarker ratios (S2), and alpha diversity metrics (S3).

#### **Additional data files:**

- **Additional file 2:** QIIME output in Biological Observation Matrix (biom) data format for all samples
- **Additional file 3:** An Excel file with multiple sheets, representing relative abundance of different taxa (phyla, classes, order, family, genera)

**Figure S1:**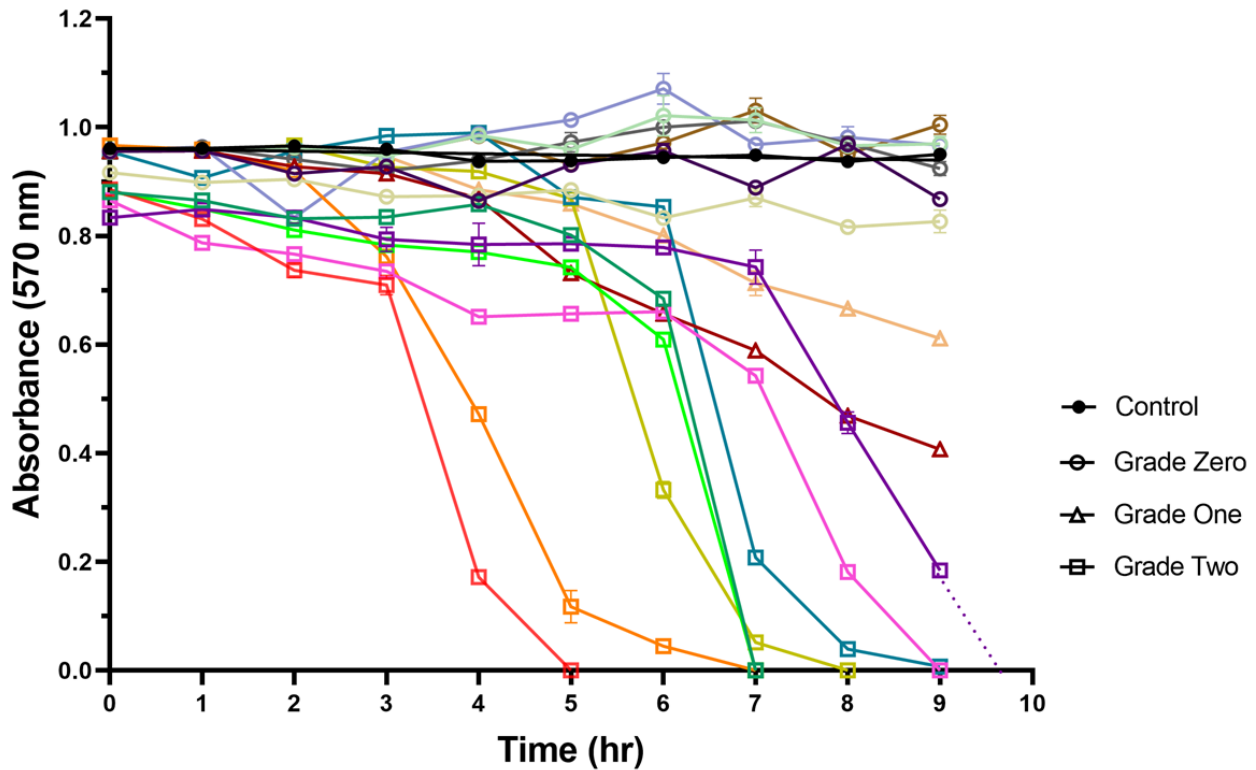

**Total azoreduction by stool samples.** Line plots representing the decrease in absorbance vs. time by different stool samples incubated with 0.06M Brilliant Black for 10 hours. Absorbance was measured hourly. Different samples ( $n = 16$ ) are shown in different colors, and the corresponding negative control (blank) is shown in a black line with solid circles. Different azo-reduction grades are shown in different shapes (open circles = grade zero; open triangles = grade one; open squares = grade two).

**Figure S2:**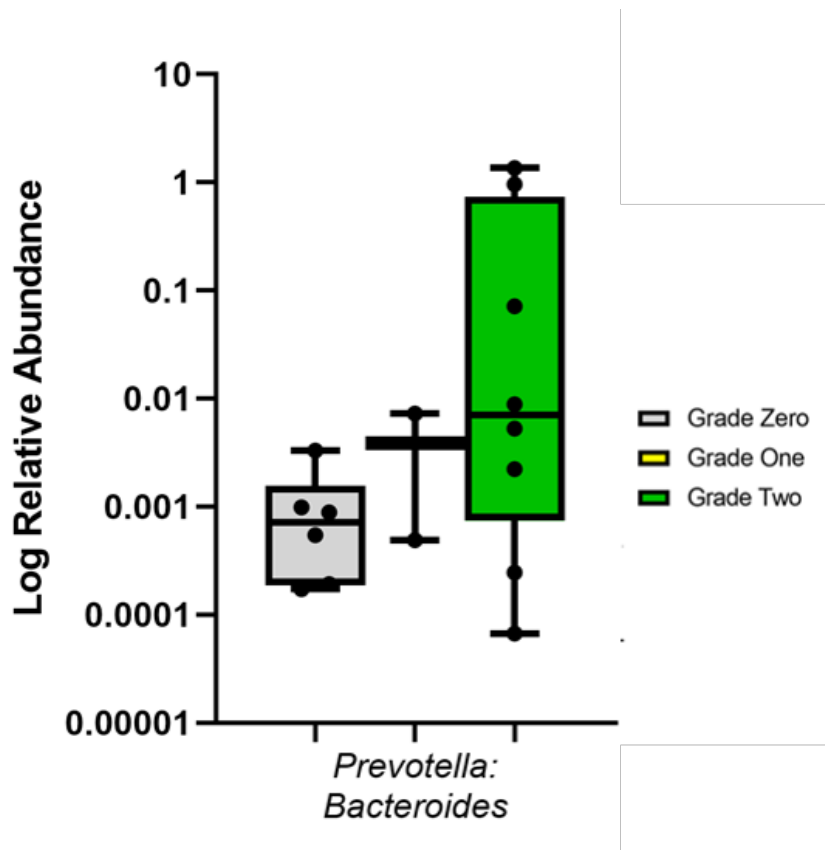

**Boxplots of the *Prevotella*-to-*Bacteroides* ratio among the three groups of samples, based on their azo-reducing activity, represented on a log-scale (Log 10) to emphasize the difference between low ratios (see Figure 2C for a linear scale, in context of other variables).**

**Figure S3:**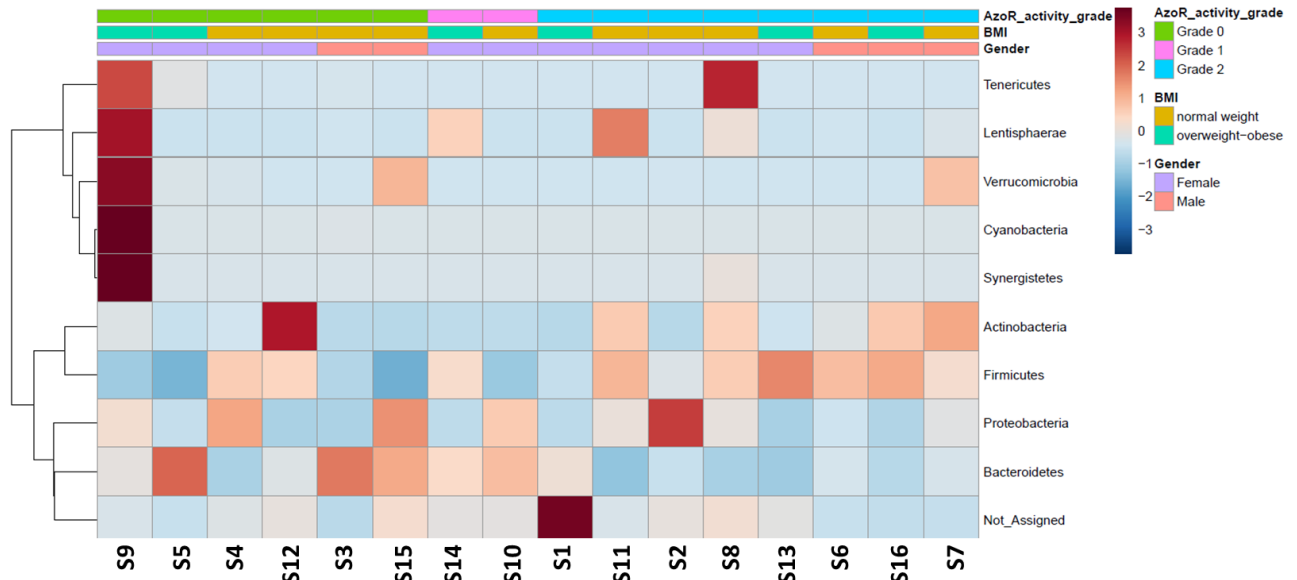

**Heatmap visualization of hierarchical clustering of the gut microbiota composition at the phylum level.** Samples are categorized according to different criteria and arranged according to their azo-reducing activity. Colors on top of the heatmap represent the azo-reducing activity to which samples belong, subject sex and subject BMI category. Heatmap color (blue to dark red) displays the row-scaled relative abundance of each taxon across all samples. Clustering was based on Euclidean distances. The figure was generated by *MicrobiomeAnalyst* (URL: <https://www.microbiomeanalyst.ca>)

**Figure S4:**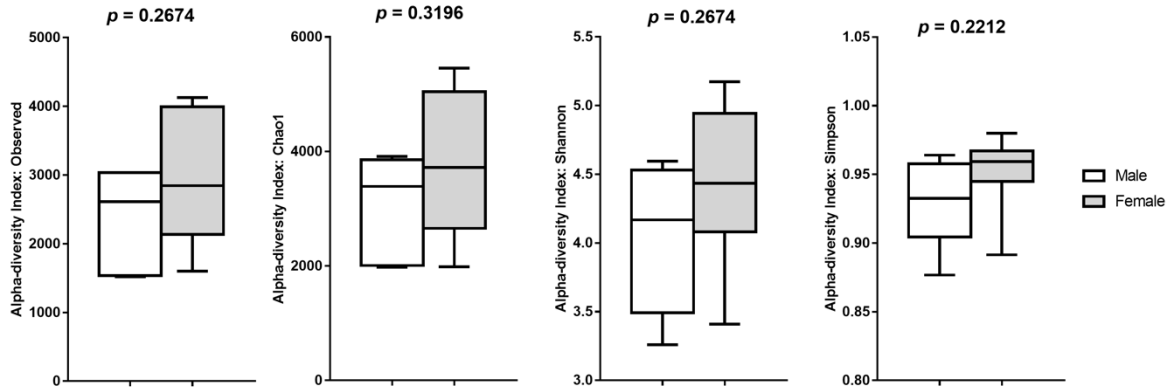

**Boxplots comparing alpha diversity metrics in males and females.** Alpha diversity metrics (observed OTUs, Chao1, Shannon and Simpson indices) are compared between both sexes. No significant differences were observed (Mann Whitney test  $p$ -value  $> 0.05$ ).

**Figure S5:**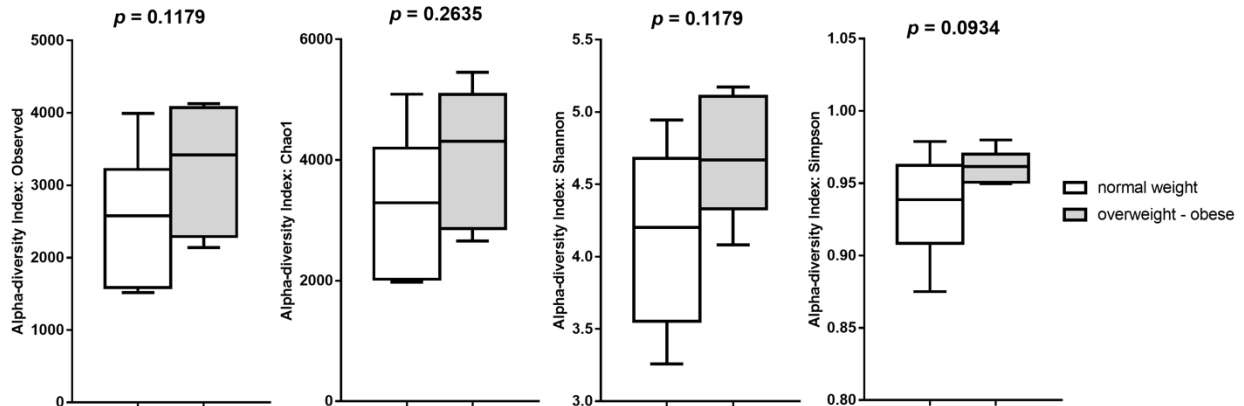

**Boxplots comparing alpha diversity metrics among BMI groups.** Observed OTUs, Chao1, Shannon and Simpson indices are compared in different BMI groups. No significant differences were observed. Mann Whitney test  $p$ -values are shown above each plot.

**Table S1:** Multivariate analysis with partial least squares (PLS) regression of composite variables vs. the **relative abundance of the main gut phyla:** Actinobacteria, Bacteroidetes, Firmicutes, and Proteobacteria

| Independent Variables | Dependent variable: Firmicutes     |                            |           |
|-----------------------|------------------------------------|----------------------------|-----------|
|                       | ANOVA <i>p</i> -value              | Regression <i>p</i> -value | R squared |
| Azo-reducing activity | 0.0081*                            | 0.0252*                    | 0.6786    |
| Gender                | 0.1968                             |                            |           |
| BMI                   | 0.4319                             |                            |           |
| Age                   | 0.1423                             |                            |           |
| Independent Variables | Dependent variable: Bacteroidetes  |                            |           |
|                       | ANOVA <i>p</i> -value              | Regression <i>p</i> -value | R squared |
| Azo-reducing activity | 0.0007***                          | 0.0016**                   | 0.8221    |
| Gender                | 0.0087**                           |                            |           |
| BMI                   | 0.0451*                            |                            |           |
| Age                   | 0.0592                             |                            |           |
| Independent Variables | Dependent variable: Actinobacteria |                            |           |
|                       | ANOVA <i>p</i> -value              | Regression <i>p</i> -value | R squared |
| Azo-reducing activity | 0.8399                             | 0.1289                     | 0.5294    |
| Gender                | 0.507                              |                            |           |
| BMI                   | 0.0215*                            |                            |           |
| Age                   | 0.0148*                            |                            |           |
| Independent Variables | Dependent variable: Proteobacteria |                            |           |
|                       | ANOVA <i>p</i> -value              | Regression <i>p</i> -value | R squared |
| Azo-reducing activity | 0.8722                             | 0.316                      | 0.4052    |
| Gender                | 0.4841                             |                            |           |
| BMI                   | 0.3507                             |                            |           |
| Age                   | 0.2452                             |                            |           |

\*  $p < 0.05$ , \*\*  $p < 0.01$ , \*\*\*  $p < 0.001$

**Table S2:** Multivariate analysis with partial least squares (PLS) regression of composite variables vs. various **gut microbiome biomarkers** (Firmicutes-to-Bacteroidetes, *Prevotella*-to-*Bacteroides* and *Fusobacterium*-to-*Bifidobacterium* ratios).

| Independent Variables | Dependent variable: Firmicutes-to-Bacteroidetes                      |                            |           |
|-----------------------|----------------------------------------------------------------------|----------------------------|-----------|
|                       | ANOVA <i>p</i> -value                                                | Regression <i>p</i> -value | R squared |
| Azo-reducing activity | 0.0045**                                                             | 0.0148*                    | 0.7146    |
| Gender                | 0.0768                                                               |                            |           |
| BMI                   | 0.2514                                                               |                            |           |
| Age                   | 0.1507                                                               |                            |           |
| Independent Variables | Dependent variable: <i>Prevotella</i> -to- <i>Bacteroides</i>        |                            |           |
|                       | ANOVA <i>p</i> -value                                                | Regression <i>p</i> -value | R squared |
| Azo-reducing activity | 0.3915                                                               | 0.2286                     | 0.4553    |
| Gender                | 0.0507#                                                              |                            |           |
| BMI                   | 0.8499                                                               |                            |           |
| Age                   | 0.5666                                                               |                            |           |
| Independent Variables | Dependent variable: <i>Fusobacterium</i> -to- <i>Bifidobacterium</i> |                            |           |
|                       | ANOVA <i>p</i> -value                                                | Regression <i>p</i> -value | R squared |
| Azo-reducing activity | 0.2026                                                               | 0.2723                     | 0.4292    |
| Gender                | 0.3171                                                               |                            |           |
| BMI                   | 0.7898                                                               |                            |           |
| Age                   | 0.3402                                                               |                            |           |

\*  $p < 0.05$ , \*\*  $p < 0.01$  & # marginal significance

**Table S3:** Multivariate analysis with partial least squares (PLS) regression of composite variables vs. alpha diversity indices at the genus level (Observed OTUs, Chao1, Shannon, and Simpson).

| Independent Variables | Dependent variable: Observed OTUs |                            |           |
|-----------------------|-----------------------------------|----------------------------|-----------|
|                       | ANOVA <i>p</i> -value             | Regression <i>p</i> -value | R squared |
| Azo-reducing activity | 0.3674                            | 0.1335                     | 0.5253    |
| Gender                | 0.1381                            |                            |           |
| BMI                   | 0.6843                            |                            |           |
| Age                   | 0.0949                            |                            |           |
| Independent Variables | Dependent variable: Chao1 Index   |                            |           |
|                       | ANOVA <i>p</i> -value             | Regression <i>p</i> -value | R squared |
| Azo-reducing activity | 0.5729                            | 0.1772                     | 0.4902    |
| Gender                | 0.4099                            |                            |           |
| BMI                   | 0.8183                            |                            |           |
| Age                   | 0.0414*                           |                            |           |
| Independent Variables | Dependent variable: Shannon Index |                            |           |
|                       | ANOVA <i>p</i> -value             | Regression <i>p</i> -value | R squared |
| Azo-reducing activity | 0.086                             | 0.2686                     | 0.4313    |
| Gender                | 0.5341                            |                            |           |
| BMI                   | 0.4843                            |                            |           |
| Age                   | 0.3601                            |                            |           |
| Independent Variables | Dependent variable: Simpson Index |                            |           |
|                       | ANOVA <i>p</i> -value             | Regression <i>p</i> -value | R squared |
| Azo-reducing activity | 0.0329*                           | 0.0978                     | 0.56      |
| Gender                | 0.2985                            |                            |           |
| BMI                   | 0.2127                            |                            |           |
| Age                   | 0.1493                            |                            |           |

\*  $p < 0.05$
